# Supplementary material for: Illumina Next Generation Sequencing for the Analysis of Eimeria Populations in Commercial Broilers and Indigenous Chickens
Source: Front Vet Sci. 2018 Jul 30;5:176. doi: 10.3389/fvets.2018.00176 (PMC6077195; doi:10.3389/fvets.2018.00176)
Supplement: Supplementary file 3 [file Table_3.XLSX]

## Sheet: Supplementary file
Supplementary Table 3. Percentage abundance of individual Eimeria species calculated using next generation sequencing (NGS; black) and digital PCR targeting single copy SCAR markers (dPCR; red). Ct values derived by quantitative PCR targeting ITS-2 (qPCR; blue; nd = not detected, - = not done).
Farm	Eac_NGS	Eac_dPCR	Eac_qPCR	Ebr_NGS	Ebr_dPCR	Ebr_qPCR	Ema_NGS	Ema_dPCR	Ema_qPCR	Emi_NGS	Emi_dPCR	Emi_qPCR	Ene_NGS	Ene_dPCR	Ene_qPCR	Epr_NGS	Epr_dPCR	Epr_qPCR	Ete_NGS	Ete_dPCR	Ete_qPCR
1	0	0	nd	0	0	nd	0	0	nd	0	0	nd	20.7201	0	nd	0	0	-	79.2799	0	nd
2	0	0	nd	0	0	nd	0	0	nd	0.00565723	0	nd	16.9208	0	nd	0	0	-	83.0736	0	nd
3	0	0	nd	0	0	nd	0	0	nd	0.0208355	0	nd	13.7931	0	nd	0	0	-	86.1861	0	nd
4	0.0119503	0	nd	0	0	nd	0	0	nd	0	0	nd	16.9097	0	nd	0	0	-	83.0784	100	34.1
5	0.953815	0	34.42	0	0	nd	0	0	nd	0.125502	0	nd	20.4568	0	nd	0	0	-	78.4639	100	29.06
6	0.0155606	0	nd	0.081693	0	nd	2.64919	0	nd	0.0311211	0	nd	18.4937	0	nd	0.00389014	0	-	78.7248	100	20.29
7	0	0	nd	0	0	nd	0	0	nd	0	0	nd	28.3585	0	nd	0	0	-	71.6415	0	nd
8	0.897451	0	nd	0	0	nd	0	0	nd	0	100	nd	20.2166	0	nd	0	0	-	78.886	0	nd
9	0	0	-	0	0	-	0.274021	0	-	0	0	-	30.8127	0	-	0	0	-	68.9132	0	-
10	0	0	-	0	0	-	0	0	-	0.279653	0	-	27.6985	0	-	0	0	-	72.0219	100	-
11	0	0	-	0	0	-	7.38636	0	-	0	0	-	15.483	0	-	0	0	-	77.1307	0	-
12	0	0	-	0	0	-	0	0	-	0	0	-	33.6132	0	-	0	0	-	66.3868	0	-
13	0	0	-	0	0	-	0	0	-	0	0	-	19.5811	0	-	0	0	-	80.4189	0	-
14	0	0	-	0	0	-	0	0	-	0	0	-	25.5846	0	-	0	0	-	74.4154	0	-
15	0	0	-	0	0	-	0	0	-	0	0	-	19.5765	0	-	0	0	-	80.4235	100	-
16	0	0	-	0	0	-	0	0	-	0	0	-	27.9375	0	-	0	0	-	72.0625	0	-
17	0.0710669	0	-	0	0	-	0	0	-	0	0	-	24.216	0	-	0.0177667	0	-	75.6951	0	-
18	0	0	-	0	0	-	0.00967305	0	-	0	0	-	25.9818	0	-	0.0773844	0	-	73.9311	0	-
19	0.00282518	0	-	0	0	-	0	0	-	0	0	-	26.6669	0	-	0.00847553	0	-	73.3218	0	-
20	0.0077006	0	-	0.0077006	0	-	0	0	-	0	0	-	26.6903	0	-	0.0077006	0	-	73.2866	0	-
21	0.62496	0	-	40.8887	98	-	0.0279192	0	-	0.122415	2	-	15.9483	0	-	0.0365097	0	-	42.3512	0.003	-
22	0	0	-	0.023015	0	-	0	0	-	0	0	-	31.496	0	-	0.0345224	0	-	68.4465	100	-
23	0.137909	0	nd	0.00788053	0	nd	0	0	nd	0.00788053	0	nd	40.3562	0	nd	0.0118208	0	-	59.4783	100	nd
24	0.0203801	0	nd	0.0152851	0	nd	0.00509502	0	nd	0.01019	0	nd	36.195	0	nd	0.0152851	0	-	63.7387	0	nd
25	0	0	nd	0	0	nd	0	0	nd	0.0048151	0	nd	30.7829	0	nd	0.0048151	0	-	69.2074	0	nd
26	0.0126948	0	36.4	0.0031737	0	nd	0.577613	0	34.02	0	0	nd	22.3428	0	nd	0.0253896	0	-	77.0383	100	24.46
27	0	0	nd	0.250941	0	nd	0	0	nd	0.250941	0	nd	25.2196	0	nd	2.38394	100	-	71.8946	0	35.34
28	0.00637674	0	nd	0.0127535	0	nd	0	0	nd	0	0	nd	23.8044	0	nd	0	0	-	76.1765	0	nd
29	0.156863	0	nd	0.470588	0	nd	0	0	nd	0.0784314	0	nd	36.7843	0	nd	0.235294	0	-	62.2745	0	37.75
30	6.08974	0	29.78	1.28205	0	nd	0	0	nd	0	0	nd	27.5641	0	nd	0	0	-	65.0641	100	nd
31	0.0168705	0	-	1.13032	0	-	3.89709	0	-	0	0	-	21.9654	0	-	8.24125	0	-	64.7491	100	-
32	0.100042	0	-	0	0	-	0.0917049	0	-	89.2955	93.1	-	2.28429	0	-	0.0166736	0	-	8.21175	6.9	-
33	0.0235156	0	-	0	0	-	4.96179	0	-	29.6649	0.9	-	14.1564	0	-	0	0	-	51.1817	99.1	-
34	1.29887	0	-	78.6309	66.3	-	0.165736	0	-	10.1117	21.1	-	2.90398	3.1	-	0.190957	0	-	6.69249	9.5	-
35	1.16203	0	-	0.652217	0	-	98.1288	0	-	0	0	-	0.0113924	0	-	0.0427217	0	-	0	0	-
36	45.9654	0	-	17.432	0	-	3.48371	0	-	23.9951	0	-	0.32007	0	-	8.78003	0	-	0.00673832	0	-
